# Supplementary material for: Erk1/2-Dependent HNSCC Cell Susceptibility to Erastin-Induced Ferroptosis
Source: MDPI journal article supplement (doi:10.3390/cells12020336), 2023-01-16
Supplement: s1 [file s1]

## Study population

**Table S1. Study population.** Characteristics of the 37 patients with head and neck cancer, who gave their written informed consent to spend a histological sample for this study, and the RNA and cDNA samples were of sufficient quality for further processing.

|                               |                                      |    |        |
|-------------------------------|--------------------------------------|----|--------|
| <b>sex</b>                    | male                                 | 36 | 97%    |
|                               | female                               | 1  | 3%     |
| <b>age</b>                    | <=50                                 | 1  | 3%     |
|                               | 51–60                                | 7  | 19%    |
|                               | 61–70                                | 21 | 57%    |
|                               | 71–80                                | 4  | 11%    |
|                               | >80                                  | 4  | 11%    |
| <b>ASA score</b>              | ASA I/II                             | 26 | 70%    |
|                               | ASA III/IV                           | 11 | 30%    |
| <b>tumor site</b>             | lips/oral cavity                     | 4  | 11%    |
|                               | oropharynx                           | 16 | 43%    |
|                               | hypopharynx                          | 7  | 19%    |
|                               | Larynx                               | 10 | 27%    |
| <b>histology</b>              | squamous cell carcinoma              | 37 | 100%   |
|                               | P16-positive oropharynx SCC          | 9  | 56.25% |
| <b>HPV/tumor localization</b> | P16-negative oropharynx SCC          | 7  | 43.75% |
|                               | P16-positive larynx SCC              | 1  | 10%    |
|                               | P16-negative larynx SCC              | 9  | 90%    |
|                               | P16-negative SCC of lips/oral cavity | 4  | 100%   |
|                               | P16-negative SCC of hypopharynx      | 7  | 100%   |
| <b>UICC stage</b>             | stage 1                              | 4  | 11%    |
|                               | stage 2                              | 2  | 5%     |
|                               | stage 3                              | 11 | 30%    |
|                               | stage 4a                             | 17 | 46%    |
|                               | stage 4b                             | 2  | 5%     |
|                               | stage 4c                             | 1  | 3%     |
| <b>HPV status</b>             | negative (<70%)                      | 27 | 73%    |
|                               | positive (≥70%)                      | 10 | 27%    |
| <b>P53 status</b>             | regular                              | 11 | 30%    |
|                               | irregular                            | 26 | 70%    |
| <b>treatment modality</b>     | surgery                              | 9  | 24%    |
|                               | surgery & RT                         | 7  | 19%    |
|                               | surgery & RCHT/RIT                   | 1  | 3%     |
|                               | RCHT/RIT                             | 18 | 49%    |
|                               | RT                                   | 1  | 3%     |
|                               | CHT                                  | 1  | 3%     |
